# Supplementary material for: Accumulation of Tetrahymena pyriformis on Interfaces
Source: MDPI journal article supplement (doi:10.3390/mi12111339), 2021-10-30
Supplement: s1 [file s1]

# Supplementary Materials: Accumulation and Crowding Effect of *Tetrahymena pyriformis* on Interfaces

Kohei Okuyama<sup>1</sup>, Yukinori Nishigami<sup>2</sup>, Takuya Ohmura<sup>3</sup> and Masatoshi Ichikawa<sup>1\*</sup>

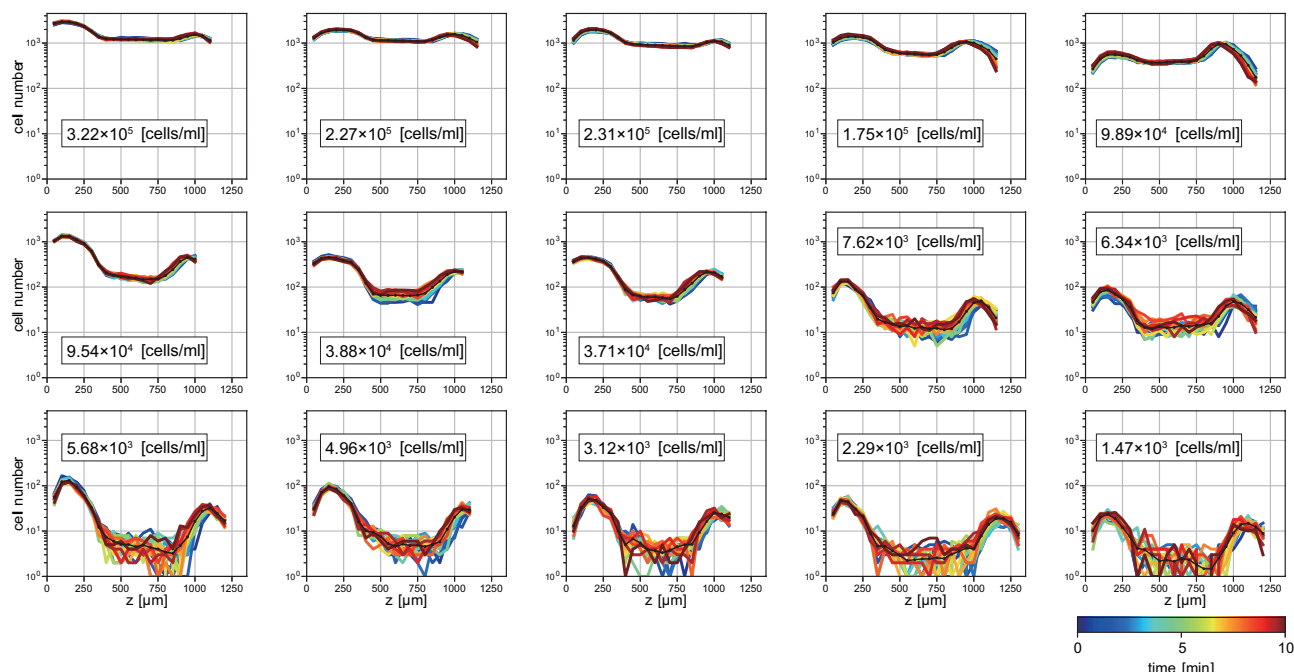

**Figure S1.** Logarithm plots of spatial cell distribution of *T. pyriformis* suspension as the function of height-axis  $z$  with their time developments denoted by colors overwritten by their average in black lines.

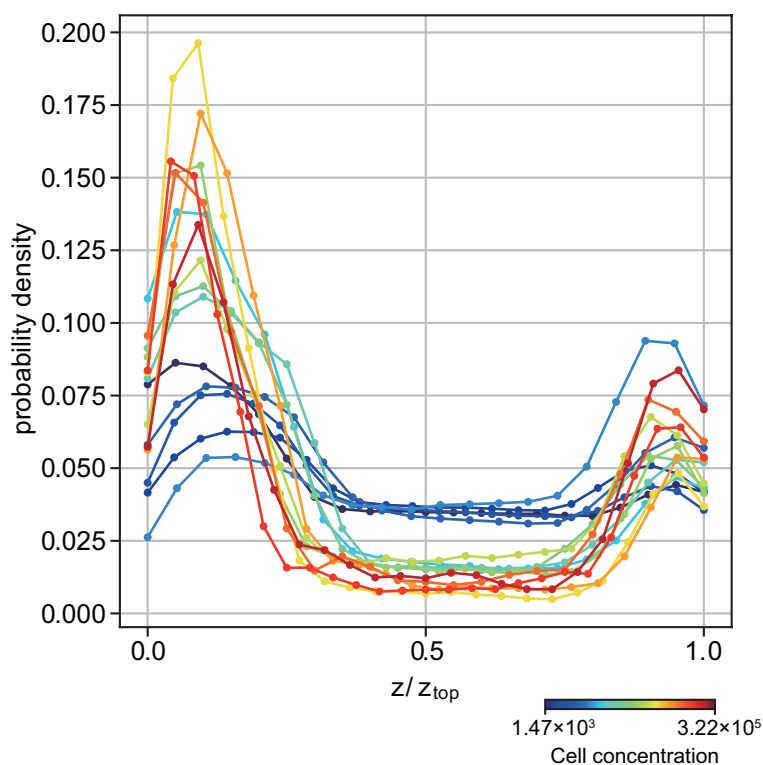

**Figure S2.** Probability density of number of cells as the function of the normalized height  $z/z_{\text{top}}$  depending on concentration of cells.
